# Supplementary material
Source: publisher figshare collection journal article supplement (https://acs.figshare.com/ndownloader/files/3721300)
Supplement: Supplementary file 1 [file 3721300]

Compound	SMILES
1	N#CC1=CC=C(C(N2C=NC=N2)C3=CC=C(C#N)C=C3)C=C1
2	CC(C)(C#N)C1=CC(C(C)(C#N)C)=CC(CN2N=CN=C2)=C1
3	O=C1C=C[C@@]2(C)C(C(C[C@]3([H])[C@]2([H])CC[C@@]4(C)[C@@]3([H])CCC4=O)=C)=C1
4	CC/C(C1=CC=CC=C1)=C(C2=CC=CC=C2)/C3=CC=C(OCCN(C)C)C=C3
5	OC(C=C1)=CC=C1/C(C2=CC=C(OCCN)C=C2)=C(CC)/C3=CC=CC=C3
Z-5	OC(C=C1)=CC=C1/C(C2=CC=C(OCCN)C=C2)=C(CC)/C3=CC=CC=C3
E-5	OC(C=C1)=CC=C1/C(C2=CC=C(OCCN)C=C2)=C(CC)\C3=CC=CC=C3
6	OC(C=C1)=CC=C1/C(C2=CC=C(OCCN)C=C2)=C(CC)/C3=CC=C(O)C=C3
7	OC(C=C1)=CC=C1/C(C2=CC=C(O)C=C2)=C(CC)\C3=CC=CC=C3
8	CC(C1=CC=CC=C1)=O
9	OC(C=C1)=CC=C1/C(C2=CC=C(O)C=C2)=C(C)/C3=CC=CC=C3
10	C/C(C1=CC=CC=C1)=C(C2=CC=C(OCOC)C=C2)/C3=CC=C(OCOC)C=C3
11	OC(C=C1)=CC=C1/C(C2=CC=C(O)C=C2)=C(CC#N)\C3=CC=CC=C3
12	OC(C=C1)=CC=C1/C(C2=CC=C(O)C=C2)=C(CN3C=NC=C3)\C4=CC=CC=C4
13	OC(C=C1)=CC=C1/C(C2=CC=C(O)C=C2)=C(CN3N=CN=C3)\C4=CC=CC=C4
14a	OC1=CC=C(C(C)=O)C=C1
14b	OC1=CC=C(C(C)=O)C=C1F
15a	OC1=CC=C(/C(C2=CC=C(O)C=C2)=C(C3=CC=C(OC(C(C)(C)C)=O)C=C3)/C)C=C1
15b	OC1=CC=C(/C(C2=CC=C(O)C=C2)=C(C3=CC(F)=C(OC(C(C)(C)C)=O)C=C3)/C)C=C1
16a	C/C(C1=CC=C(OC(C(C)(C)C)=O)C=C1)=C(C2=CC=C(OCOC)C=C2)/C3=CC=C(OCOC)C=C3
16b	C/C(C1=CC(F)=C(OC(C(C)(C)C)=O)C=C1)=C(C2=CC=C(OCOC)C=C2)/C3=CC=C(OCOC)C=C3
17a	OC1=CC=C(/C(C2=CC=C(O)C=C2)=C(C3=CC=C(O)C=C3)/CC#N)C=C1
17b	OC1=CC=C(/C(C2=CC=C(O)C=C2)=C(C3=CC(F)=C(O)C=C3)/CC#N)C=C1
18a	OC1=CC=C(/C(C2=CC=C(O)C=C2)=C(C3=CC=C(O)C=C3)/CN4C=NC=C4)C=C1
18b	OC1=CC=C(/C(C2=CC=C(O)C=C2)=C(C3=CC(F)=C(O)C=C3)/CN4C=NC=C4)C=C1
19a	OC1=CC=C(/C(C2=CC=C(O)C=C2)=C(C3=CC=C(O)C=C3)/CN4C=NC=N4)C=C1
19b	OC1=CC=C(/C(C2=CC=C(O)C=C2)=C(C3=CC(F)=C(O)C=C3)/CN4C=NC=N4)C=C1
20a	OC1=CC=C(/C(C2=CC=C(O)C=C2)=C(C3=CC=C(O)C=C3)/CN4C=NN=C4)C=C1
20b	OC1=CC=C(/C(C2=CC=C(O)C=C2)=C(C3=CC(F)=C(O)C=C3)/CN4C=NN=C4)C=C1
21	CC(C1=CC=C(N)C=C1)=O
22	O=C(C1=CC=C(OC(C(C)(C)C)=O)C=C1)C2=CC=C(OC(C(C)(C)C)=O)C=C2
23	NC(C=C1)=CC=C1/C(C)=C(C2=CC=C(OC(C(C)(C)C)=O)C=C2)\C3=CC=C(OC(C(C)(C)C)=O)C=C3
24	C/C(C1=CC=C(NC(OC(C)(C)C)=O)C=C1)=C(C2=CC=C(OC(C(C)(C)C)=O)C=C2)/C3=CC=C(OC(C(C)(C)C)=O)C=C3
25	OC(C=C1)=CC=C1/C(C2=CC=C(O)C=C2)=C(CC#N)/C3=CC=C(N)C=C3
26	OC(C=C1)=CC=C1/C(C2=CC=C(O)C=C2)=C(CN3C=NC=C3)/C4=CC=C(N)C=C4
27	OC(C=C1)=CC=C1/C(C2=CC=C(O)C=C2)=C(CN3C=NC=N3)/C4=CC=C(N)C=C4
28	OC(C=C1)=CC=C1/C(C2=CC=C(O)C=C2)=C(CN3C=NN=C3)/C4=CC=C(N)C=C4
29	CC(C1=CC(O)=CC=C1)=O
30	CC(C1=CC(OC(C(C)(C)C)=O)=CC=C1)=O
31	C/C(C1=CC(OC(C(C)(C)C)=O)=CC=C1)=C(C2=CC=C(OCOC)C=C2)/C3=CC=C(OCOC)C=C3
32	OC1=CC=C(/C(C2=CC=C(O)C=C2)=C(C3=CC(O)=CC=C3)/CN4C=NC=C4)C=C1
33	CC(C1=CC(N)=CC=C1)=O
34	C/C(C1=CC(NC(OC(C)(C)C)=O)=CC=C1)=C(C2=CC=C(OC(C(C)(C)C)=O)C=C2)/C3=CC=C(OC(C(C)(C)C)=O)C=C3
35	OC1=CC=C(/C(C2=CC=C(O)C=C2)=C(C3=CC(N)=CC=C3)/CN4C=NC=C4)C=C1
36	OC(C=C1)=CC=C1/C(C2=CC=C(OCCN)C=C2)=C(CN3C=NC=C3)\C4=CC=CC=C4
